# Supplementary material for: Combination Therapy of Phage vB_KpnM_P-KP2 and Gentamicin Combats Acute Pneumonia Caused by K47 Serotype Klebsiella pneumoniae
Source: PubMed Central journal article supplement (PMC8100603; doi:10.3389/fmicb.2021.674068), 2021-04-22
Supplement: Data_Sheet_1.pdf [file Data_Sheet_1.pdf]

## Supplementary Material

### Supplementary Figures

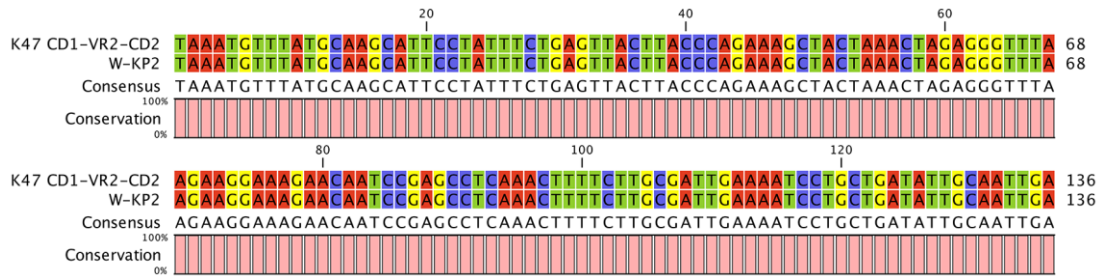

**Supplementary Figure 1.** Serotype identification of *K. pneumoniae* W-KP2. After alignment with the CD1-VR2-CD2 reference sequence of each serotype *K. pneumoniae* strain, W-KP2 has been identified as a member of K47 serotype strains.

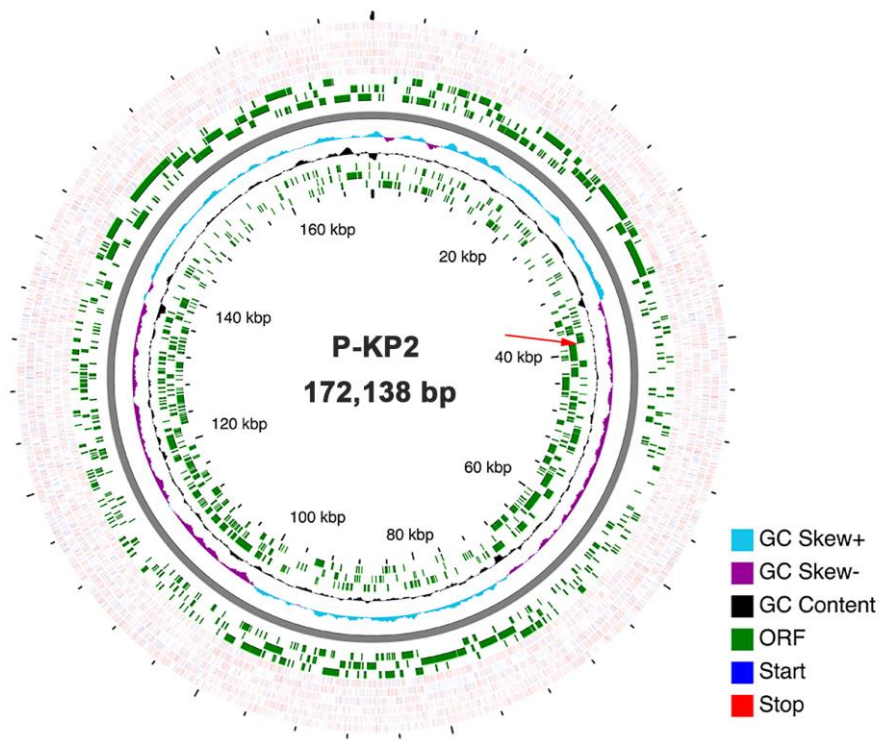

**Supplementary Figure 2.** Circular view of the P-KP2 genome. The ORFs, G + C content, skew and termini (red arrow) of P-KP2 genome were illustrated. The circle map was generated using CGView (<http://wishart.biology.ualberta.ca/cgview/>) and the termini of the phage genome was identified as 38,590 bp by PhageTerm (<https://sourceforge.net/projects/phageterm>).

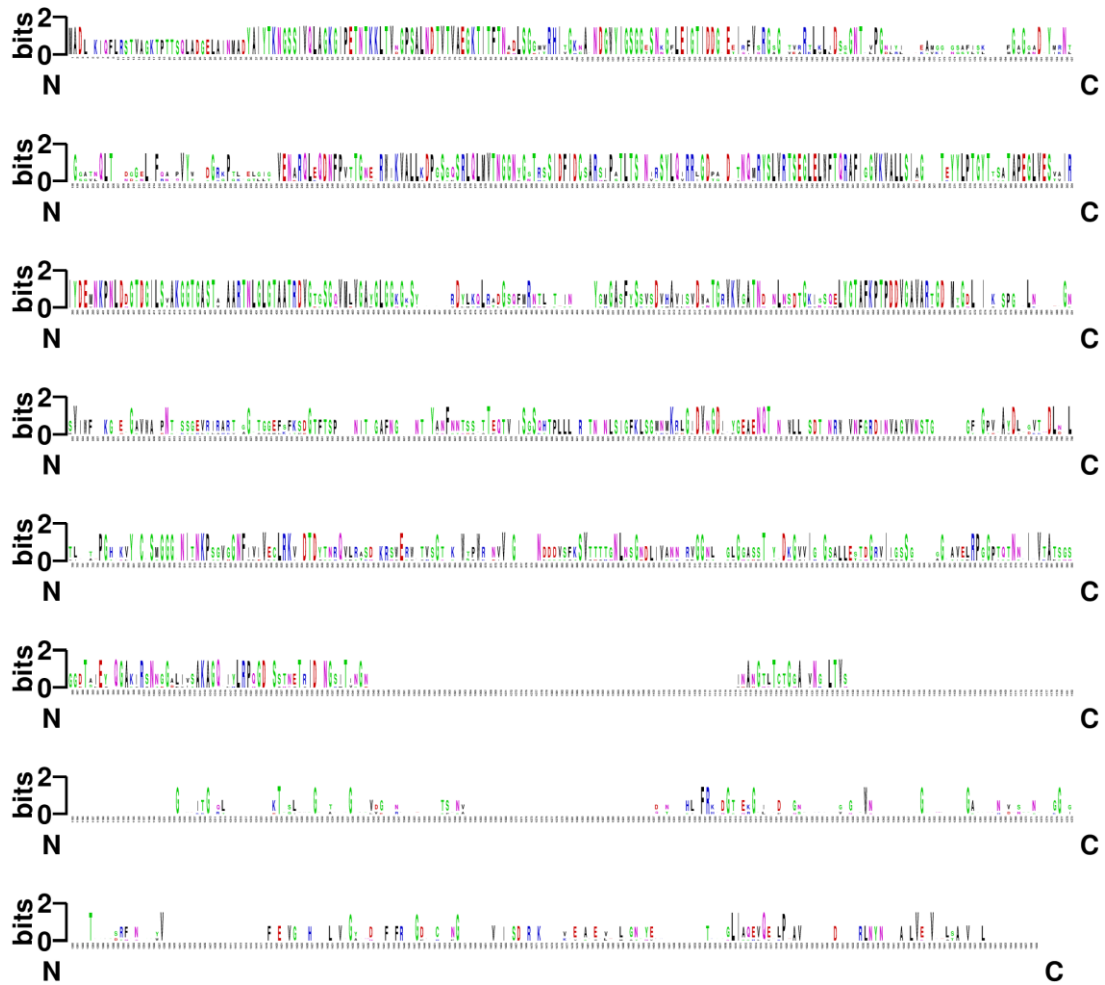

**Supplementary Figure 3.** Sequence conservation analysis of P-KP2 ORF46 in comparison with other homologous sequences. P-KP2 ORF46, phiEap-3 gp266, KP27 gp286, KP15 gp234 and phT4A gp254 were aligned and displayed as sequence logo, which was created online at <http://weblogo.berkeley.edu/logo.cgi>.

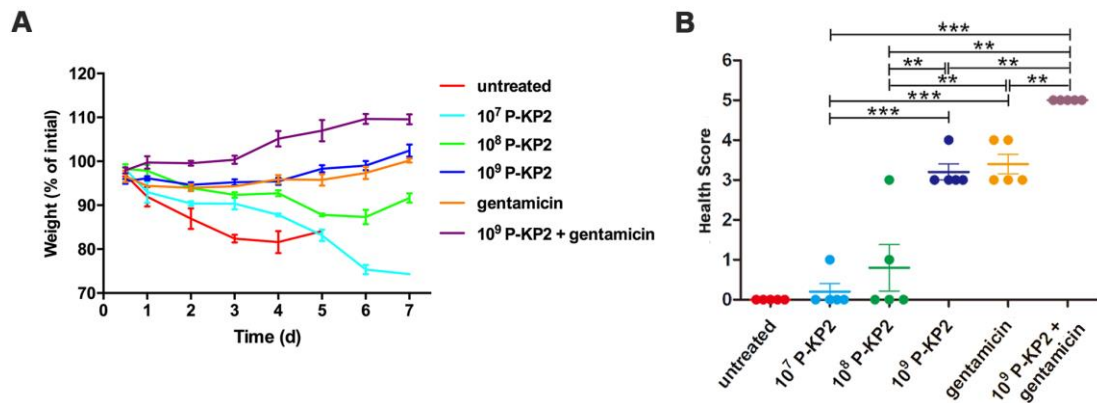

**Supplementary Figure 4.** Body weight and Health status of mice in different groups. All the mice were challenged intranasally with  $1.0 \times 10^9$  CFU/mouse of *K. pneumoniae* W-KP2. After 1 h post infection, they were treated with different doses of P-KP2 ( $1.0 \times 10^7$  PFU/mouse,  $1.0 \times 10^8$  PFU/mouse or  $1.0 \times 10^9$  PFU/mouse), gentamicin (1.5 mg/kg), or phage-antibiotic combination, respectively. The untreated group was administered with PBS under the same conditions. (A) Body weight. Body weight change ( $[\text{measured weight}/\text{initial weight}] \times 100\%$ ) of mice in each group during 7 days was determined ( $n = 3$ ). (B) Health status. The health status of each group of mice within 7 days was scored on a scale of 5 to 0. Complete health was defined as having almost no symptoms, with a score of 5; mild illness was defined as reduced physical activity and ruffled fur, with a score of 4. Moderate illness was defined as kyphosis and lethargy, with a score of 3. Severe illness was defined as the exudative accumulation around half-closed eyes in addition to the above signs, with a score of 2. The dying state was scored as 1; death was recorded as 0. Each dot represents the health status of a single mouse ( $n = 5$ ). \*, \*\*, and \*\*\* represent significant differences at  $P < 0.05$ ,  $P < 0.01$ , and  $P < 0.001$ , respectively.

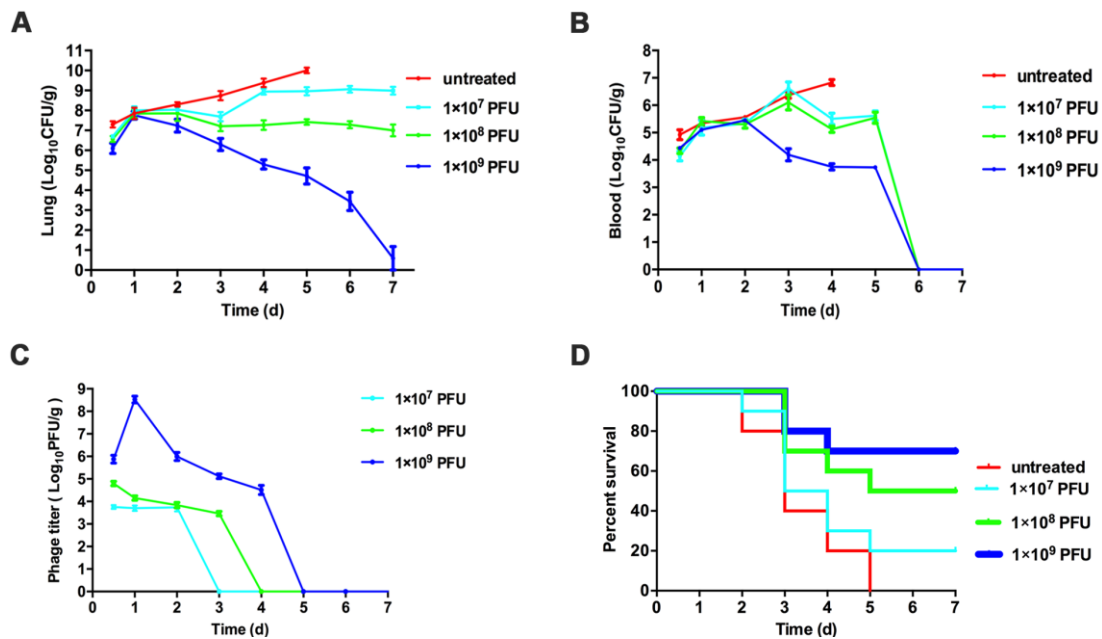

**Supplementary Figure 5.** Therapeutic effects of W-KP2-infected mice treated with different doses of P-KP2. All the mice were challenged intranasally with  $1.0 \times 10^9$  CFU/mouse of *K. pneumoniae* W-KP2. After 1 h post infection, they were treated with different doses of P-KP2 ( $1.0 \times 10^7$  PFU/mouse,  $1.0 \times 10^8$  PFU/mouse or  $1.0 \times 10^9$  PFU/mouse), respectively. The control untreated group was treated administered with PBS under the same conditions. (A) Bacterial loads in the lungs. At every 24 h (lasting for 7 days) after W-KP2 infection, the right lungs of the euthanized mice in each group were carefully separated, weighed and homogenized. Then the bacterial loads in the lung homogenates were detected after serial dilution (n = 3). (B) Bacterial loads in blood. Peripheral blood samples (10  $\mu$ L) were obtained from the caudal veins of the anesthetized mice (n = 3). (C) Phage titers in the lungs. Phage titers of lung homogenates of each group were detected after serial dilution (n = 3). The above data represent the mean  $\pm$  SEM of triplicate experiments. (D) Survival rates. Survival rates of mice in each group during 7 days were determined. Each group contained ten mice. Statistical analysis was performed using the Kaplan-Meier method by (P < 0.0001, log-rank (Mantel-Cox) test).

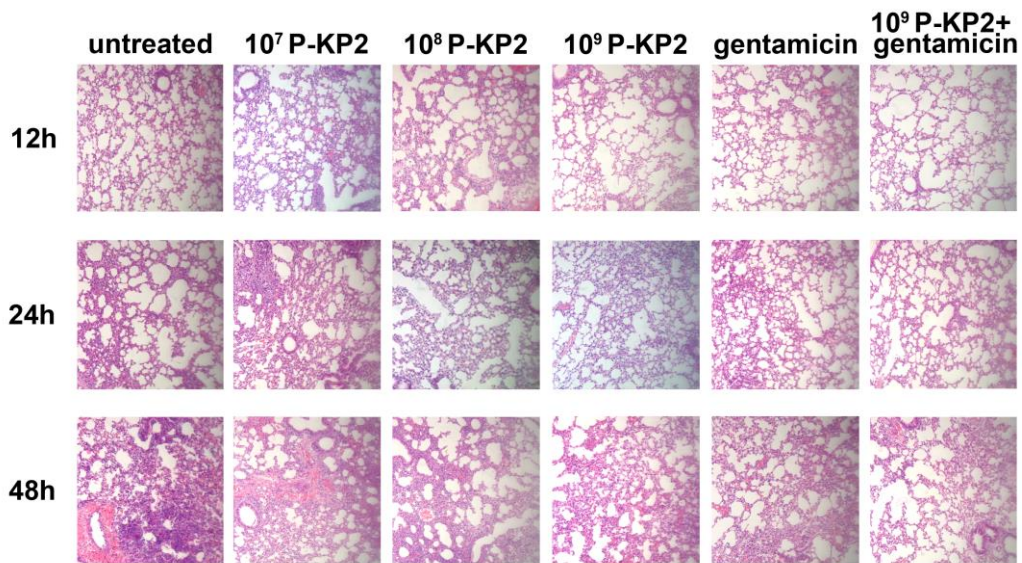

**Supplementary Figure 6.** Pathological observation at different times after infection.

All the mice were challenged intranasally with  $1.0 \times 10^9$  CFU/mouse of *K. pneumoniae* W-KP2. After 1 h post infection, they were treated with different doses of P-KP2 ( $1.0 \times 10^7$  PFU/mouse,  $1.0 \times 10^8$  PFU/mouse or  $1.0 \times 10^9$  PFU/mouse), gentamicin (1.5 mg/kg), or phage-antibiotic combination, respectively. The untreated group was administered with PBS under the same conditions. At 12h 24h and 48 h after W-KP2 infection, the lungs of the euthanized mice in each group were photographed after careful removal, and the sections of Left lung tissues were stained with H&E (magnification,  $\times 100$ ).

**Supplementary Table S1.** The antibiotic-resistance of *K. pneumoniae* W-KP2.

| <b>Antibiotics</b> | Cefuroxime axetil | Cefepime | Imipenem | Gentamicin | Ampicillin | Cefazolin | Cefuroxime | Piperacillin |
|--------------------|-------------------|----------|----------|------------|------------|-----------|------------|--------------|
| <b>MIC (µg/ml)</b> | ≥64               | ≥64      | ≥16      | ≤1         | ≥32        | ≥64       | ≥64        | ≥128         |
| <b>Sensitivity</b> | R                 | R        | R        | S          | R          | R         | R          | R            |

**Table S1** (Continued).

| <b>Antibiotics</b> | Ceftazidime | Ceftriaxone | Meropenem | Ciprofloxacin | Levofloxacin | Cefotetan | Aztreonam | Ampicillin/Sulbactam |
|--------------------|-------------|-------------|-----------|---------------|--------------|-----------|-----------|----------------------|
| <b>MIC (µg/ml)</b> | ≥64         | ≥64         | ≥16       | ≥4            | ≥8           | ≥64       | ≥64       | ≥32                  |
| <b>Sensitivity</b> | R           | R           | R         | R             | R            | R         | R         | R                    |

S, Susceptible; R, Resistant.

**Supplementary Table S2.** The host spectrum of P-KP2

| <b>species</b>               | <b>ID</b> | <b>spot</b> | <b>plaque</b> |
|------------------------------|-----------|-------------|---------------|
| <i>Klebsiella pneumoniae</i> | W-KP2     | +           | +             |
| <i>Klebsiella pneumoniae</i> | W-KP46    | +           | +             |
| <i>Klebsiella pneumoniae</i> | W-KP54    | +           | +             |
| <i>Klebsiella pneumoniae</i> | W-KP60    | +           | +             |
| <i>Klebsiella pneumoniae</i> | W-KP73    | +           | +             |
| <i>Klebsiella pneumoniae</i> | W-KP82    | +           | +             |
| <i>Klebsiella pneumoniae</i> | W-KP83    | +           | +             |
| <i>Klebsiella pneumoniae</i> | W-KP86    | +           | +             |
| <i>Klebsiella pneumoniae</i> | W-KP90    | +           | +             |
| <i>Klebsiella pneumoniae</i> | W-KP93    | +           | +             |
| <i>Klebsiella pneumoniae</i> | W-KP1     | -           | -             |
| <i>Klebsiella pneumoniae</i> | W-KP3     | -           | -             |
| <i>Klebsiella pneumoniae</i> | W-KP4     | -           | -             |
| <i>Klebsiella pneumoniae</i> | W-KP5     | -           | -             |
| <i>Klebsiella pneumoniae</i> | W-KP6     | -           | -             |
| <i>Klebsiella pneumoniae</i> | W-KP7     | -           | -             |
| <i>Klebsiella pneumoniae</i> | W-KP8     | -           | -             |
| <i>Klebsiella pneumoniae</i> | W-KP9     | -           | -             |
| <i>Klebsiella pneumoniae</i> | W-KP10    | -           | -             |
| <i>Klebsiella pneumoniae</i> | W-KP11    | -           | -             |
| <i>Klebsiella pneumoniae</i> | W-KP12    | -           | -             |
| <i>Klebsiella pneumoniae</i> | W-KP13    | -           | -             |
| <i>Klebsiella pneumoniae</i> | W-KP14    | -           | -             |
| <i>Klebsiella pneumoniae</i> | W-KP15    | -           | -             |
| <i>Klebsiella pneumoniae</i> | W-KP16    | -           | -             |
| <i>Klebsiella pneumoniae</i> | W-KP17    | -           | -             |
| <i>Klebsiella pneumoniae</i> | W-KP18    | -           | -             |
| <i>Klebsiella pneumoniae</i> | W-KP19    | -           | -             |
| <i>Klebsiella pneumoniae</i> | W-KP20    | -           | -             |



|                              |        |   |   |
|------------------------------|--------|---|---|
| <i>Klebsiella pneumoniae</i> | W-KP21 | - | - |
| <i>Klebsiella pneumoniae</i> | W-KP22 | - | - |
| <i>Klebsiella pneumoniae</i> | W-KP23 | - | - |
| <i>Klebsiella pneumoniae</i> | W-KP24 | - | - |
| <i>Klebsiella pneumoniae</i> | W-KP25 | - | - |
| <i>Klebsiella pneumoniae</i> | W-KP26 | - | - |
| <i>Klebsiella pneumoniae</i> | W-KP27 | - | - |
| <i>Klebsiella pneumoniae</i> | W-KP28 | - | - |
| <i>Klebsiella pneumoniae</i> | W-KP29 | - | - |
| <i>Klebsiella pneumoniae</i> | W-KP30 | - | - |
| <i>Klebsiella pneumoniae</i> | W-KP31 | - | - |
| <i>Klebsiella pneumoniae</i> | W-KP32 | - | - |
| <i>Klebsiella pneumoniae</i> | W-KP33 | - | - |
| <i>Klebsiella pneumoniae</i> | W-KP34 | - | - |
| <i>Klebsiella pneumoniae</i> | W-KP35 | - | - |
| <i>Klebsiella pneumoniae</i> | W-KP36 | - | - |
| <i>Klebsiella pneumoniae</i> | W-KP37 | - | - |
| <i>Klebsiella pneumoniae</i> | W-KP38 | - | - |
| <i>Klebsiella pneumoniae</i> | W-KP39 | - | - |
| <i>Klebsiella pneumoniae</i> | W-KP40 | - | - |
| <i>Klebsiella pneumoniae</i> | W-KP41 | - | - |
| <i>Klebsiella pneumoniae</i> | W-KP42 | - | - |
| <i>Klebsiella pneumoniae</i> | W-KP43 | - | - |
| <i>Klebsiella pneumoniae</i> | W-KP44 | - | - |
| <i>Klebsiella pneumoniae</i> | W-KP45 | - | - |
| <i>Klebsiella pneumoniae</i> | W-KP47 | - | - |
| <i>Klebsiella pneumoniae</i> | W-KP48 | - | - |
| <i>Klebsiella pneumoniae</i> | W-KP49 | - | - |
| <i>Klebsiella pneumoniae</i> | W-KP50 | - | - |
| <i>Klebsiella pneumoniae</i> | W-KP51 | - | - |
| <i>Klebsiella pneumoniae</i> | W-KP52 | - | - |
| <i>Klebsiella pneumoniae</i> | W-KP53 | - | - |

|                              |        |   |   |
|------------------------------|--------|---|---|
| <i>Klebsiella pneumoniae</i> | W-KP55 | - | - |
| <i>Klebsiella pneumoniae</i> | W-KP56 | - | - |
| <i>Klebsiella pneumoniae</i> | W-KP57 | - | - |
| <i>Klebsiella pneumoniae</i> | W-KP58 | - | - |
| <i>Klebsiella pneumoniae</i> | W-KP59 | - | - |
| <i>Klebsiella pneumoniae</i> | W-KP80 | - | - |
| <i>Klebsiella pneumoniae</i> | W-KP81 | - | - |
| <i>Klebsiella pneumoniae</i> | W-KP84 | - | - |
| <i>Klebsiella pneumoniae</i> | W-KP85 | - | - |
| <i>Klebsiella pneumoniae</i> | W-KP87 | - | - |
| <i>Klebsiella pneumoniae</i> | W-KP88 | - | - |
| <i>Klebsiella pneumoniae</i> | W-KP89 | - | - |
| <i>Klebsiella pneumoniae</i> | W-KP91 | - | - |
| <i>Klebsiella pneumoniae</i> | W-KP92 | - | - |
| <i>Klebsiella pneumoniae</i> | W-KP94 | - | - |
| <i>Klebsiella pneumoniae</i> | W-KP95 | - | - |
| <i>Klebsiella pneumoniae</i> | W-KP96 | - | - |
| <i>Klebsiella pneumoniae</i> | W-KP97 | - | - |
| <i>Klebsiella pneumoniae</i> | W-KP98 | - | - |

**Supplementary Table S3.** General features of putative ORFs of phage P-KP2 with the best matches in non-redundant protein sequence database from NCBI.

| ORF     | bp    |      | Len<br>gth<br>(aa) | Protein<br>size<br>(kDa) | pI     | Annotated function | Representative similarity to<br>proteins in database | E<br>value                            | Query<br>cover | Identity<br>(positives) | Accession no. |                |
|---------|-------|------|--------------------|--------------------------|--------|--------------------|------------------------------------------------------|---------------------------------------|----------------|-------------------------|---------------|----------------|
|         | Start | Stop |                    |                          |        |                    |                                                      |                                       |                |                         |               |                |
| 1+      | AUG   | 164  | 583                | 139                      | 16.120 | 8.49               | single stranded<br>DNA-binding<br>protein            | [ <i>Klebsiella</i> phage KP15]       | 2e-96          | 100%                    | 100% (100%)   | YP_003580063.1 |
| 2+      | AUG   | 583  | 759                | 58                       | 6.320  | 4.24               | hypothetical protein<br>CPT_Matisse225               | [ <i>Klebsiella</i> phage Matisse]    | 7e-34          | 100%                    | 100% (100%)   | YP_009194469.1 |
| 3+      | AUG   | 964  | 1116               | 50                       | 5.861  | 10.29              | hypothetical protein<br>Lw1_gp222                    | [ <i>Escherichia</i> phage Lw1]       | 1e-04          | 48%                     | 83% (48%)     | YP_008060743.1 |
| 4-      | AUG   | 1195 | 1428               | 77                       | 8.919  | 4.65               | hypothetical protein<br>KP15_188A                    | [ <i>Klebsiella</i> phage KP15]       | 2e-47          | 100%                    | 100% (100%)   | YP_003934978.1 |
| 5-      | GUG   | 1437 | 2936               | 499                      | 13.891 | 9.21               | Helicase                                             | [ <i>Klebsiella</i> phage KP27]       | 0.0            | 100%                    | 99% (100%)    | YP_007348859.1 |
| 6+      | AUG   | 3007 | 3567               | 186                      | 2.139  | 4.45               | minor capsid<br>protein inhibitor of<br>protease     | [ <i>Klebsiella</i> phage KP27]       | 4e-134         | 100%                    | 96% (100%)    | YP_007348860.1 |
| 7+      | AUG   | 3660 | 3971               | 103                      | 12.131 | 5.31               | hypothetical protein<br>KP15_193                     | [ <i>Klebsiella</i> phage KP15]       | 2e-71          | 100%                    | 100% (100%)   | YP_003580069.1 |
| 8+      | AUG   | 4011 | 4580               | 189                      | 21.540 | 6.21               | hypothetical protein<br>KP15_194                     | [ <i>Klebsiella</i> phage KP15]       | 3e-138         | 100%                    | 100% (100%)   | YP_003580070.1 |
| 9+      | AUG   | 4609 | 5670               | 353                      | 37.692 | 4.06               | phage tail fibers                                    | [ <i>Enterobacter</i> phage phiEap-3] | 0.0            | 100%                    | 98% (100%)    | ALA45334.1     |
| 10<br>+ | AUG   | 5681 | 5956               | 91                       | 10.772 | 4.24               | hoc large outer<br>capsid protein                    | [ <i>Klebsiella</i> phage KP15]       | 3e-60          | 100%                    | 100% (100%)   | YP_003580072.1 |
| 11<br>+ | AUG   | 5970 | 6488               | 172                      | 19.866 | 5.22               | hypothetical protein                                 | [ <i>Escherichia</i> phage phT4A]     | 1e-124         | 100%                    | 99% (100%)    | ANN86488.1     |
| 12<br>- | AUG   | 6521 | 6985               | 154                      | 17.417 | 8.52               | hypothetical protein<br>KP15_199                     | [ <i>Klebsiella</i> phage KP15]       | 7e-108         | 100%                    | 100% (100%)   | YP_003580075.1 |
| 13<br>- | AUG   | 7035 | 7874               | 279                      | 30.713 | 9.48               | hypothetical protein<br>KP15_200                     | [ <i>Klebsiella</i> phage KP15]       | 0.0            | 100%                    | 99% (100%)    | YP_003580076.1 |
| 14<br>+ | AUG   | 7989 | 8864               | 291                      | 33.928 | 7.89               | hypothetical protein<br>KP15_201                     | [ <i>Klebsiella</i> phage KP15]       | 0.0            | 100%                    | 97% (100%)    | YP_003580077.1 |
| 15<br>+ | AUG   | 8972 | 9214               | 80                       | 8.793  | 5.77               | hypothetical protein<br>ADS69_00235                  | [ <i>Enterobacter</i> phage phiEap-3] | 2e-52          | 100%                    | 100% (100%)   | ALA45340.1     |
| 16<br>+ | AUG   | 9211 | 9387               | 58                       | 6.473  | 4.13               | hypothetical protein<br>KP15_203                     | [ <i>Klebsiella</i> phage KP15]       | 8e-33          | 100%                    | 100% (100%)   | YP_003580079.1 |

|    |     |       |       |     |        |       |                                                         |                                       |        |      |             |                 |
|----|-----|-------|-------|-----|--------|-------|---------------------------------------------------------|---------------------------------------|--------|------|-------------|-----------------|
| 17 | AUG | 9384  | 9710  | 108 | 12.270 | 5.55  | hypothetical protein<br>KP15_204                        | [ <i>Klebsiella</i> phage KP15]       | 3e-72  | 100% | 100% (100%) | YP_003580080.1Y |
| +  |     |       |       |     |        |       |                                                         |                                       |        |      |             |                 |
| 18 | AUG | 9712  | 10068 | 118 | 13.951 | 10.29 | hypothetical protein<br>KP15_205                        | [ <i>Klebsiella</i> phage KP15]       | 4e-80  | 100% | 100% (100%) | YP_003580081.1  |
| +  |     |       |       |     |        |       |                                                         |                                       |        |      |             |                 |
| 19 | AUG | 10068 | 10592 | 174 | 19.792 | 9.69  | Srd postulated<br>decoy of host<br>sigma70              | [ <i>Klebsiella</i> phage KP15]       | 7e-126 | 100% | 100% (100%) | YP_003580082.1  |
| +  |     |       |       |     |        |       |                                                         |                                       |        |      |             |                 |
| 20 | AUG | 10596 | 11108 | 170 | 19.222 | 9.02  | RNA ligase 2                                            | [ <i>Enterobacter</i> phage phiEap-3] | 3e-105 | 87%  | 87% (100%)  | ALA45345.1      |
| +  |     |       |       |     |        |       |                                                         |                                       |        |      |             |                 |
| 21 | GUG | 11105 | 11614 | 169 | 18.978 | 7.19  | RNA ligase 2                                            | [ <i>Enterobacter</i> phage phiEap-3] | 4e-119 | 100% | 100% (100%) | ALA45345.1      |
| +  |     |       |       |     |        |       |                                                         |                                       |        |      |             |                 |
| 22 | AUG | 11604 | 12185 | 193 | 21.658 | 6.97  | hypothetical protein<br>KP15_208                        | [ <i>Klebsiella</i> phage KP15]       | 6e-139 | 100% | 99% (100%)  | YP_003580084.1  |
| +  |     |       |       |     |        |       |                                                         |                                       |        |      |             |                 |
| 23 | AUG | 12179 | 12697 | 172 | 20.068 | 6.23  | hypothetical protein<br>KP15_209                        | [ <i>Klebsiella</i> phage KP15]       | 5e-123 | 100% | 98% (100%)  | YP_003580085.1  |
| +  |     |       |       |     |        |       |                                                         |                                       |        |      |             |                 |
| 24 | AUG | 12775 | 13035 | 86  | 9.652  | 4.07  | hypothetical protein<br>KP27_263                        | [ <i>Klebsiella</i> phage KP27]       | 4e-55  | 100% | 100% (100%) | YP_007348878.1  |
| +  |     |       |       |     |        |       |                                                         |                                       |        |      |             |                 |
| 25 | AUG | 13045 | 13494 | 149 | 17.074 | 8.51  | hypothetical protein<br>KP27_264                        | [ <i>Klebsiella</i> phage KP27]       | 1e-105 | 100% | 100% (100%) | YP_007348879.1  |
| +  |     |       |       |     |        |       |                                                         |                                       |        |      |             |                 |
| 26 | AUG | 13522 | 14955 | 477 | 53.326 | 6.83  | nicotinamide<br>phosphoribosyl<br>transferase           | [ <i>Klebsiella</i> phage Miro]       | 0.0    | 100% | 100% (100%) | YP_003580088.1  |
| +  |     |       |       |     |        |       |                                                         |                                       |        |      |             |                 |
| 27 | GUG | 14942 | 15244 | 100 | 11.435 | 9.02  | hypothetical protein<br>KP27_266                        | [ <i>Klebsiella</i> phage KP27]       | 1e-65  | 100% | 99% (100%)  | YP_007348881.1  |
| +  |     |       |       |     |        |       |                                                         |                                       |        |      |             |                 |
| 28 | AUG | 15241 | 16092 | 283 | 33.355 | 6.15  | DNA adenine<br>methylase                                | [ <i>Escherichia</i> phage phT4A]     | 0.0    | 100% | 100% (100%) | ANN86504.1      |
| +  |     |       |       |     |        |       |                                                         |                                       |        |      |             |                 |
| 29 | AUG | 16101 | 16376 | 91  | 10.394 | 7.19  | NrdC thioredoxin                                        | [ <i>Klebsiella</i> phage KP15]       | 2e-61  | 100% | 100% (100%) | YP_003580091.1  |
| +  |     |       |       |     |        |       |                                                         |                                       |        |      |             |                 |
| 30 | AUG | 16408 | 16890 | 160 | 18.526 | 9.18  | recombination<br>endonuclease VII<br>ribonucleotide     | [ <i>Klebsiella</i> phage KP15]       | 6e-117 | 100% | 100% (100%) | YP_003580092.1  |
| +  |     |       |       |     |        |       |                                                         |                                       |        |      |             |                 |
| 31 | AUG | 16887 | 19010 | 707 | 79.942 | 6.75  | reductase of class<br>III (anaerobic),<br>large subunit | [ <i>Klebsiella</i> phage PMBT1]      | 0.0    | 100% | 99% (100%)  | SCO64826.1      |
| +  |     |       |       |     |        |       |                                                         |                                       |        |      |             |                 |
| 32 | AUG | 19078 | 19320 | 80  | 8.773  | 9.47  | hypothetical protein<br>ADS69_00251                     | [ <i>Enterobacter</i> phage phiEap-3] | 2e-51  | 100% | 100% (100%) | ALA45356.1      |
| +  |     |       |       |     |        |       |                                                         |                                       |        |      |             |                 |
| 33 | AUG | 19320 | 19814 | 164 | 19.103 | 9.41  | hypothetical protein<br>CPT_Matisse256                  | [ <i>Klebsiella</i> phage Matisse]    | 8e-117 | 100% | 100% (100%) | YP_009194500.1  |
| +  |     |       |       |     |        |       |                                                         |                                       |        |      |             |                 |
| 34 | AUG | 19814 | 20020 | 68  | 8.189  | 10.11 | hypothetical protein<br>KP27_273                        | [ <i>Klebsiella</i> phage KP27]       | 4e-42  | 100% | 100% (100%) | YP_007348888.1  |
| +  |     |       |       |     |        |       |                                                         |                                       |        |      |             |                 |
| 35 | AUG | 20041 | 20292 | 83  | 9.609  | 4.77  | hypothetical protein<br>KP27_274                        | [ <i>Klebsiella</i> phage KP27]       | 5e-56  | 100% | 100% (100%) | YP_007348889.1  |
| +  |     |       |       |     |        |       |                                                         |                                       |        |      |             |                 |
| 36 | AUG | 20353 | 20547 | 64  | 7.663  | 8.82  | hypothetical protein                                    | [ <i>Klebsiella</i> phage KP15]       | 2e-38  | 100% | 100% (100%) | YP_003580100.1  |



|    |     |       |       |     |        |      |                                         |                                               |        |      |             |                |
|----|-----|-------|-------|-----|--------|------|-----------------------------------------|-----------------------------------------------|--------|------|-------------|----------------|
| 57 | AUG | 37271 | 37645 | 124 | 14.110 | 9.77 | hypothetical protein<br>KP15_240        | [ <i>Klebsiella</i> phage KP15]               | 3e-83  | 100% | 98% (100%)  | YP_003580116.1 |
| 58 | AUG | 37691 | 38590 | 299 | 34.030 | 9.26 | rIIb protein                            | [ <i>Klebsiella</i> phage KP27]               | 0.0    | 100% | 99% (100%)  | YP_007348913.1 |
| 59 | AUG | 38590 | 40851 | 753 | 86.966 | 8.54 | phage rIIA lysis<br>inhibitor           | [ <i>Klebsiella</i> phage PMBT1]              | 0.0    | 100% | 99% (100%)  | SCO64579.1     |
| 60 | AUG | 40862 | 41098 | 78  | 9.133  | 8.88 | hypothetical protein<br>CPT_Miro3       | [ <i>Klebsiella</i> phage Miro]               | 8e-48  | 100% | 95% (100%)  | AKU44587.1     |
| 61 | AUG | 41102 | 41656 | 184 | 21.284 | 9.62 | hypothetical protein<br>KP27_003<br>DNA | [ <i>Klebsiella</i> phage KP27]               | 9e-135 | 100% | 100% (100%) | YP_007348640.1 |
| 62 | AUG | 41728 | 43014 | 428 | 48.883 | 6.92 | topoisomerase<br>medium subunit<br>DNA  | [ <i>Klebsiella</i> phage KP27]               | 0.0    | 100% | 100% (100%) | YP_007348641.1 |
| 63 | AUG | 43014 | 44912 | 632 | 70.988 | 6.58 | topoisomerase large<br>subunit          | [ <i>Klebsiella</i> phage KP27]               | 0.0    | 100% | 100% (100%) | YP_007348642.1 |
| 64 | AUG | 44980 | 45144 | 54  | 6.226  | 8.16 | hypothetical protein<br>GAP161_006      | [ <i>Cronobacter</i> phage<br>vB_CsaM_GAP161] | 1e-30  | 100% | 96% (100%)  | YP_006986282.1 |
| 65 | AUG | 45144 | 45584 | 146 | 17.604 | 4.77 | transcriptional<br>regulator            | [ <i>Escherichia</i> phage phT4A]             | 3e-106 | 100% | 100% (100%) | ANN86274.1     |
| 66 | AUG | 45607 | 46191 | 194 | 22.056 | 6.24 | hypothetical protein<br>KP27_010        | [ <i>Klebsiella</i> phage KP27]               | 1e-141 | 100% | 99% (100%)  | YP_007348645.1 |
| 67 | AUG | 46178 | 46456 | 92  | 10.406 | 7.31 | hypothetical protein                    | [ <i>Escherichia</i> phage phT4A]             | 2e-63  | 100% | 100% (100%) | ANN86276.1     |
| 68 | AUG | 46453 | 47049 | 198 | 22.497 | 4.99 | hypothetical protein<br>CPT_Matisse11   | [ <i>Klebsiella</i> phage Matisse]            | 6e-147 | 100% | 100% (100%) | YP_009194255.1 |
| 69 | AUG | 47089 | 47418 | 109 | 12.543 | 9.34 | hypothetical protein<br>KP27_014        | [ <i>Klebsiella</i> phage KP27]               | 3e-75  | 100% | 100% (100%) | YP_007348648.1 |
| 70 | AUG | 47478 | 47702 | 74  | 8.723  | 6.36 | hypothetical protein<br>KP27_016        | [ <i>Klebsiella</i> phage KP27]               | 2e-46  | 100% | 100% (100%) | YP_007348649.1 |
| 71 | AUG | 47776 | 48039 | 87  | 10.071 | 9.65 | hypothetical protein<br>KP15_13B        | [ <i>Klebsiella</i> phage KP15]               | 1e-56  | 100% | 100% (100%) | YP_003934935.1 |
| 72 | AUG | 48128 | 48427 | 99  | 11.559 | 8.12 | hypothetical protein<br>KP15_14         | [ <i>Klebsiella</i> phage KP15]               | 1e-65  | 100% | 100% (100%) | YP_003579890.1 |
| 73 | AUG | 48427 | 48651 | 74  | 8.372  | 9.65 | hypothetical protein<br>KP27_022        | [ <i>Klebsiella</i> phage KP27]               | 1e-47  | 100% | 100% (100%) | YP_007348654.1 |
| 74 | AUG | 48655 | 48804 | 49  | 5.612  | 8.22 | hypothetical protein<br>KP15_14B        | [ <i>Klebsiella</i> phage KP15]               | 6e-26  | 100% | 100% (100%) | YP_003934937.1 |
| 75 | AUG | 48871 | 49152 | 93  | 10.587 | 8.42 | hypothetical protein<br>KP15_15         | [ <i>Klebsiella</i> phage KP15]               | 2e-60  | 100% | 99% (100%)  | YP_003579891.1 |
| 76 | AUG | 49149 | 49820 | 223 | 26.005 | 5.17 | DexA exonuclease<br>A                   | [ <i>Klebsiella</i> phage KP15]               | 5e-165 | 100% | 100% (100%) | YP_003579892.1 |
| 77 | AUG | 49817 | 50101 | 94  | 10.867 | 4.85 | hypothetical protein<br>KP27_026        | [ <i>Klebsiella</i> phage KP27]               | 1e-63  | 100% | 100% (100%) | YP_007348658.1 |

|    |     |       |       |     |         |      |                                                                       |                                       |        |      |             |                 |
|----|-----|-------|-------|-----|---------|------|-----------------------------------------------------------------------|---------------------------------------|--------|------|-------------|-----------------|
| 78 | AUG | 50102 | 50410 | 102 | 11.790  | 5.09 | hypothetical protein<br>KP15_18                                       | [ <i>Klebsiella</i> phage KP15]       | 1e-67  | 100% | 100% (100%) | YP_003579894.1  |
| 79 | AUG | 50435 | 51763 | 442 | 50.617  | 7.04 | dda DNA helicase                                                      | [ <i>Klebsiella</i> phage KP15]       | 0.0    | 100% | 100% (100%) | YP_003579895.1  |
| 80 | AUG | 51760 | 52050 | 96  | 11.327  | 9.11 | hypothetical protein<br>KP15_20                                       | [ <i>Klebsiella</i> phage KP15]       | 3e-63  | 100% | 100% (100%) | YP_003579896.1  |
| 81 | AUG | 52232 | 52768 | 178 | 20.634  | 4.72 | dCTP<br>pyrophosphatase                                               | [ <i>Klebsiella</i> phage KP15]       | 9e-131 | 100% | 100% (100%) | YP_003579897.1+ |
| 82 | AUG | 52776 | 53801 | 341 | 39.607  | 8.63 | DNA primase<br>subunit                                                | [ <i>Klebsiella</i> phage KP27]       | 0.0    | 100% | 100% (100%) | YP_007348664.1  |
| 83 | AUG | 53805 | 54065 | 86  | 9.562   | 6.32 | hypothetical protein<br>KP27_032                                      | [ <i>Klebsiella</i> phage KP27]       | 2e-57  | 100% | 100% (100%) | YP_007348665.1  |
| 84 | AUG | 54121 | 54618 | 165 | 18.879  | 9.65 | hypothetical protein<br>ADS69_00027                                   | [ <i>Enterobacter</i> phage phiEap-3] | 3e-116 | 100% | 98% (100%)  | ALA45132.1      |
| 85 | AUG | 54624 | 55700 | 358 | 40.595  | 4.53 | methyltransferase                                                     | [ <i>Escherichia</i> phage Lw1]       | 2e-155 | 67%  | 87% (92%)   | YP_008060555.1  |
| 86 | AUG | 55726 | 55962 | 78  | 8.527   | 9.56 | hypothetical protein<br>KP15_26A                                      | [ <i>Klebsiella</i> phage KP15]       | 7e-46  | 100% | 100% (100%) | YP_003934939.1  |
| 87 | AUG | 56054 | 56308 | 84  | 9.516   | 4.27 | hypothetical protein<br>KP15_27                                       | [ <i>Klebsiella</i> phage KP15]       | 4e-53  | 100% | 100% (100%) | YP_003579903.1  |
| 88 | AUG | 56388 | 56657 | 89  | 10.068  | 9.83 | hypothetical protein<br>KP15_27A                                      | [ <i>Klebsiella</i> phage KP15]       | 5e-55  | 100% | 100% (100%) | YP_003934940.1  |
| 89 | AUG | 56701 | 58137 | 478 | 53.617  | 5.83 | replication and<br>recombination<br>DNA helicase<br>membrane-associat | [ <i>Klebsiella</i> phage KP27]       | 0.0    | 100% | 100% (100%) | YP_007348673.1+ |
| 90 | AUG | 58147 | 58467 | 106 | 12.368  | 5.28 | ed initiation of head<br>vertex<br>RecA-like                          | [ <i>Klebsiella</i> phage KP15]       | 2e-70  | 100% | 100% (100%) | YP_003579905.1  |
| 91 | AUG | 58505 | 59662 | 385 | 43.093  | 4.79 | recombination<br>protein                                              | [ <i>Klebsiella</i> phage KP27]       | 0.0    | 100% | 100% (100%) | YP_007348675.1  |
| 92 | AUG | 59737 | 62436 | 899 | 104.337 | 5.96 | DNA polymerase                                                        | [ <i>Klebsiella</i> phage KP27]       | 0.0    | 100% | 99% (100%)  | YP_007348676.1  |
| 93 | AUG | 62483 | 62812 | 109 | 12.637  | 8.17 | hypothetical protein<br>CPT_Miro40                                    | [ <i>Klebsiella</i> phage Miro]       | 6e-73  | 100% | 100% (100%) | AKU44624.1      |
| 94 | AUG | 62809 | 63096 | 95  | 11.219  | 5.22 | hypothetical protein<br>CPT_Matisse40                                 | [ <i>Klebsiella</i> phage Matisse]    | 7e-63  | 100% | 99% (100%)  | YP_009194284.1  |
| 95 | AUG | 63165 | 63527 | 120 | 14.344  | 9.52 | RegA                                                                  | [ <i>Klebsiella</i> phage KP27]       | 9e-83  | 100% | 100% (100%) | YP_007348679.1  |









|     |     |       |       |       |        |      |                      |                                               |        |      |             |                |  |  |
|-----|-----|-------|-------|-------|--------|------|----------------------|-----------------------------------------------|--------|------|-------------|----------------|--|--|
| 152 |     |       |       |       |        |      | baseplate hub        |                                               |        |      |             |                |  |  |
| +   | AUG | 98551 | 99294 | 247   | 28.527 | 4.88 | assembly protein     | [ <i>Klebsiella</i> phage KP15]               | 9e-180 | 100% | 100% (100%) | YP_003579967.1 |  |  |
| 153 |     |       |       |       |        |      | baseplate hub        |                                               |        |      |             |                |  |  |
| +   | AUG | 99291 | 99845 | 184   | 21.474 | 4.95 | subunit              | [ <i>Klebsiella</i> phage KP15]               | 5e-135 | 100% | 100% (100%) | YP_003579968.1 |  |  |
| 154 |     |       | 10023 |       |        |      | tail lysozyme        |                                               |        |      |             |                |  |  |
| +   | AUG | 99846 | 8     | 130   | 14.453 | 4.19 |                      | [ <i>Klebsiella</i> phage KP15]               | 1e-89  | 100% | 100% (100%) | YP_003579970.1 |  |  |
| 155 |     |       | 10027 | 10072 |        |      | hypothetical protein |                                               |        |      |             |                |  |  |
| -   | AUG | 3     | 8     | 151   | 17.601 | 5.04 | KP15_95              | [ <i>Klebsiella</i> phage KP15]               | 3e-106 | 100% | 97% (100%)  | YP_003579971.1 |  |  |
| 156 |     |       | 10073 | 10096 |        |      | hypothetical protein |                                               |        |      |             |                |  |  |
| -   | AUG | 6     | 0     | 74    | 8.351  | 5.18 | KP15_95A             | [ <i>Klebsiella</i> phage KP15]               | 2e-46  | 100% | 97% (100%)  | YP_003934954.1 |  |  |
| 157 |     |       | 10096 | 10124 |        |      | hypothetical protein |                                               |        |      |             |                |  |  |
| -   | AUG | 2     | 6     | 94    | 10.879 | 5.16 | KP15_96              | [ <i>Klebsiella</i> phage KP15]               | 9e-61  | 100% | 100% (100%) | YP_003579972.1 |  |  |
| 158 |     |       | 10131 | 10160 |        |      | hypothetical protein |                                               |        |      |             |                |  |  |
| -   | AUG | 8     | 2     | 94    | 10.811 | 4.23 | KP15_96A             | [ <i>Klebsiella</i> phage KP15]               | 6e-62  | 100% | 100% (100%) | YP_003934955.1 |  |  |
| 159 |     |       | 10161 | 10208 |        |      | hypothetical protein |                                               |        |      |             |                |  |  |
| -   | AUG | 8     | 8     | 156   | 17.696 | 4.18 | CPT_Matisse113       | [ <i>Klebsiella</i> phage Matisse]            | 4e-109 | 100% | 100% (100%) | YP_009194357.1 |  |  |
| 160 |     |       | 10208 | 10224 |        |      | hypothetical protein |                                               |        |      |             |                |  |  |
| -   | AUG | 5     | 3     | 52    | 5.859  | 8.23 | KP15_97A             | [ <i>Klebsiella</i> phage KP15]               | 6e-28  | 100% | 100% (100%) | YP_003934956.1 |  |  |
| 161 |     |       | 10224 | 10289 |        |      | hypothetical protein |                                               |        |      |             |                |  |  |
| -   | GUG | 0     | 0     | 216   | 24.736 | 4.68 | KP27_126             | [ <i>Klebsiella</i> phage KP27]               | 2e-156 | 100% | 99% (100%)  | YP_007348751.1 |  |  |
| 162 |     |       | 10292 | 10514 |        |      | hypothetical protein |                                               |        |      |             |                |  |  |
| -   | AUG | 9     | 5     | 738   | 82.377 | 5.13 | KP15_100             | [ <i>Klebsiella</i> phage KP15]               | 0.0    | 100% | 100% (100%) | YP_003579976.1 |  |  |
| 163 |     |       | 10515 | 10547 |        |      | hypothetical protein |                                               |        |      |             |                |  |  |
| -   | AUG | 3     | 3     | 106   | 12.262 | 4.49 | KP15_101             | [ <i>Klebsiella</i> phage KP15]               | 2e-71  | 100% | 100% (100%) | YP_003579977.1 |  |  |
| 164 |     |       | 10547 | 10598 |        |      | hypothetical protein |                                               |        |      |             |                |  |  |
| -   | AUG | 3     | 8     | 171   | 20.099 | 4.57 | CPT_Matisse118       | [ <i>Klebsiella</i> phage Matisse]            | 3e-127 | 100% | 100% (100%) | YP_009194362.1 |  |  |
| 165 |     |       | 10598 | 10622 |        |      | hypothetical protein |                                               |        |      |             |                |  |  |
| -   | AUG | 5     | 7     | 80    | 9.06   | 5.50 | CPT_Matisse119       | [ <i>Klebsiella</i> phage Matisse]            | 8e-53  | 100% | 100% (100%) | YP_009194363.1 |  |  |
| 166 |     |       | 10621 | 10650 |        |      | hypothetical protein |                                               |        |      |             |                |  |  |
| -   | AUG | 4     | 1     | 95    | 11.058 | 4.31 | CPT_Matisse120       | [ <i>Klebsiella</i> phage Matisse]            | 4e-64  | 100% | 100% (100%) | YP_009194364.1 |  |  |
| 167 |     |       | 10670 | 10698 |        |      | hypothetical protein | [ <i>Cronobacter</i> phage<br>vB_CsaM_GAP161] | 7e-63  | 100% | 100% (100%) | YP_006986393.1 |  |  |
| -   | AUG | 8     | 6     | 92    | 10.603 | 5.82 | GAP161_115           |                                               |        |      |             |                |  |  |
| 168 |     |       | 10704 | 10795 |        |      | DNA                  |                                               |        |      |             |                |  |  |
| -   | AUG | 5     | 6     | 303   | 34.182 | 8.31 | methyltransferase    | [ <i>Klebsiella</i> phage Matisse]            | 0.0    | 100% | 100% (100%) | YP_009194367.1 |  |  |
| 169 |     |       | 10795 | 10821 |        |      | hypothetical protein |                                               |        |      |             |                |  |  |
| -   | AUG | 3     | 0     | 85    | 9.503  | 4.19 | KP27_138             | [ <i>Klebsiella</i> phage KP27]               | 4e-54  | 100% | 100% (100%) | YP_007348761.1 |  |  |
| 170 |     |       | 10821 | 10845 |        |      | hypothetical protein |                                               |        |      |             |                |  |  |
| -   | AUG | 0     | 5     | 81    | 8.984  | 5.73 | CPT_Matisse125       | [ <i>Klebsiella</i> phage Matisse]            | 1e-53  | 100% | 100% (100%) | YP_009194369.1 |  |  |
| 171 |     |       | 10845 | 10945 |        |      | hypothetical protein |                                               |        |      |             |                |  |  |
| -   | AUG | 2     | 9     | 335   | 38.083 | 7.30 | KP15_106             | [ <i>Klebsiella</i> phage KP15]               | 0.0    | 100% | 99% (100%)  | YP_003579982.1 |  |  |

|     |     |       |       |     |        |      |                                   |                                       |        |      |               |                |
|-----|-----|-------|-------|-----|--------|------|-----------------------------------|---------------------------------------|--------|------|---------------|----------------|
| 172 | AUG | 10945 | 10983 | 125 | 14.555 | 8.55 | hypothetical protein              | [ <i>Klebsiella</i> phage Matisse]    | 1e-87  | 100% | 99% (100%)    | YP_009194371.1 |
| -   |     | 9     | 6     |     |        |      | CPT_Matisse127                    |                                       |        |      |               |                |
| 173 | AUG | 10983 | 11006 | 75  | 8.756  | 8.30 | hypothetical protein              | [ <i>Klebsiella</i> phage Miro]       | 7e-48  | 100% | 99% (100%)    | AKU44712.1     |
| -   |     | 3     | 0     |     |        |      | CPT_Miro128                       |                                       |        |      |               |                |
| 174 | AUG | 11005 | 11066 | 201 | 22.284 | 7.96 | hypothetical protein              | [ <i>Klebsiella</i> phage KP15]       | 1e-142 | 100% | 99% (100%)    | YP_003579985.1 |
| -   |     | 7     | 2     |     |        |      | KP15_109                          |                                       |        |      |               |                |
| 175 | AUG | 11066 | 11093 | 90  | 10.476 | 5.29 | hypothetical protein              | [ <i>Klebsiella</i> phage Matisse]    | 8e-61  | 100% | 99% (100%)    | YP_009194374.1 |
| -   |     | 5     | 7     |     |        |      | CPT_Matisse130                    |                                       |        |      |               |                |
| 176 | AUG | 11093 | 11112 | 64  | 7.036  | 5.09 | hypothetical protein              | [ <i>Escherichia</i> virus RB16]      | 7e-38  | 100% | 100% (100%)   | YP_003858428.1 |
| -   |     | 4     | 8     |     |        |      | RB16p128                          |                                       |        |      |               |                |
| 177 | AUG | 11130 | 11236 | 353 | 40.851 | 6.99 | ADP-ribose<br>pyrophosphatase     | [ <i>Klebsiella</i> phage PMBT1]      | 0.0    | 100% | 99% (100%)    | SCO64710.1     |
| -   |     | 3     | 4     |     |        |      |                                   |                                       |        |      |               |                |
| 178 | AUG | 11254 | 11345 | 304 | 34.070 | 8.57 | hypothetical protein              | [ <i>Klebsiella</i> phage KP15]       | 0.0    | 100% | 100% (100%)   | YP_003579987.1 |
| -   |     | 1     | 5     |     |        |      | KP15_111                          |                                       |        |      |               |                |
| 179 | AUG | 11352 | 11394 | 140 | 15.933 | 6.18 | hypothetical protein              | [ <i>Klebsiella</i> phage KP27]       | 2e-98  | 100% | 100% (100%)   | YP_007348771.1 |
| -   |     | 7     | 9     |     |        |      | KP27_148                          |                                       |        |      |               |                |
| 180 | AUG | 11392 | 11420 | 93  | 10.803 | 8.49 | rI antiholin                      | [ <i>Enterobacter</i> phage phiEap-3] | 5e-65  | 100% | 77.42% (100%) | YP_009194955.1 |
| -   |     | 1     | 2     |     |        |      |                                   |                                       |        |      |               |                |
| 181 | AUG | 11430 | 11470 | 130 | 15.480 | 9.66 | hypothetical protein              | [ <i>Klebsiella</i> phage KP27]       | 6e-92  | 100% | 100% (100%)   | YP_007348773.1 |
| -   |     | 9     | 1     |     |        |      | KP27_150                          |                                       |        |      |               |                |
| 182 | AUG | 11471 | 11532 | 202 | 22.964 | 5.90 | thymidine kinase                  | [ <i>Klebsiella</i> phage KP27]       | 9e-150 | 100% | 100% (100%)   | YP_007348774.1 |
| -   |     | 8     | 6     |     |        |      |                                   |                                       |        |      |               |                |
| 183 | AUG | 11531 | 11560 | 95  | 10.722 | 9.16 | hypothetical protein              | [ <i>Klebsiella</i> phage PMBT1]      | 2e-63  | 100% | 100% (100%)   | SCO64716.1     |
| -   |     | 9     | 6     |     |        |      |                                   |                                       |        |      |               |                |
| 184 | AUG | 11560 | 11608 | 157 | 17.029 | 7.78 | hypothetical protein              | [ <i>Klebsiella</i> phage KP27]       | 2e-111 | 100% | 99% (100%)    | YP_007348778.1 |
| -   |     | 9     | 2     |     |        |      | KP27_155                          |                                       |        |      |               |                |
| 185 | AUG | 11616 | 11631 | 48  | 5.588  | 9.79 | hypothetical protein              | [ <i>Klebsiella</i> phage PMBT1]      | 1e-26  | 100% | 100% (100%)   | SCO64718.1     |
| -   |     | 7     | 3     |     |        |      |                                   |                                       |        |      |               |                |
| 186 | AUG | 11626 | 11638 | 38  | 4.247  | 3.99 | hypothetical protein              | [ <i>Klebsiella</i> phage Matisse]    | 2e-19  | 100% | 100% (100%)   | YP_009194387.1 |
| -   |     | 4     | 0     |     |        |      | CPT_Matisse143                    |                                       |        |      |               |                |
| 187 | AUG | 11638 | 11670 | 107 | 12.265 | 7.76 | hypothetical protein              | [ <i>Klebsiella</i> phage KP15]       | 3e-73  | 100% | 100% (100%)   | YP_003579993.1 |
| -   |     | 0     | 3     |     |        |      | KP15_117                          |                                       |        |      |               |                |
| 188 | AUG | 11671 | 11730 | 196 | 22.726 | 4.75 | hypothetical protein              | [ <i>Klebsiella</i> phage KP15]       | 4e-145 | 100% | 99% (100%)    | YP_003579994.1 |
| -   |     | 3     | 3     |     |        |      | KP15_118                          |                                       |        |      |               |                |
| 189 | AUG | 11730 | 11744 | 48  | 5.498  | 7.15 | hypothetical protein              | [ <i>Klebsiella</i> phage KP15]       | 1e-27  | 100% | 100% (100%)   | YP_003934964.1 |
| -   |     | 0     | 6     |     |        |      | KP15_118A                         |                                       |        |      |               |                |
| 190 | AUG | 11745 | 11785 | 131 | 15.645 | 5.06 | hypothetical protein              | [ <i>Klebsiella</i> phage Miro]       | 1e-92  | 100% | 100% (100%)   | AKU44731.1     |
| -   |     | 7     | 2     |     |        |      | CPT_Miro147                       |                                       |        |      |               |                |
| 191 | AUG | 11792 | 11856 | 213 | 23.945 | 9.53 | hypothetical protein              | [ <i>Enterobacter</i> phage phiEap-3] | 3e-155 | 100% | 99% (100%)    | ALA45251.1     |
| -   |     | 0     | 1     |     |        |      | ADS69_00146<br>protein, T4 GC1559 |                                       |        |      |               |                |







|     |     |       |       |     |        |       |                                                     |                                       |        |      |             |                |
|-----|-----|-------|-------|-----|--------|-------|-----------------------------------------------------|---------------------------------------|--------|------|-------------|----------------|
| 250 | AUG | 15713 | 15806 | 308 | 33.596 | 4.62  | neck protein                                        | [ <i>Klebsiella</i> phage KP15]       | 0.0    | 100% | 100% (100%) | YP_003580045.1 |
| +   |     | 8     | 4     |     |        |       |                                                     |                                       |        |      |             |                |
| 251 | AUG | 15807 | 15882 | 248 | 28.934 | 4.10  | neck protein                                        | [ <i>Klebsiella</i> phage KP15]       | 0.0    | 100% | 100% (100%) | YP_003580046.1 |
| +   |     | 4     | 0     |     |        |       |                                                     |                                       |        |      |             |                |
| 252 | AUG | 15890 | 15972 | 274 | 31.916 | 5.76  | tail sheath stabilizer<br>and completion<br>protein | [ <i>Enterobacter</i> phage phiEap-3] | 0.0    | 100% | 99%(100%)   | ALA45314.1     |
| +   |     | 0     | 4     |     |        |       |                                                     |                                       |        |      |             |                |
| 253 | AUG | 15972 | 16026 | 179 | 20.008 | 4.44  | small terminase<br>protein                          | [ <i>Klebsiella</i> phage KP15]       | 3e-128 | 100% | 100% (100%) | YP_003580048.1 |
| +   |     | 4     | 3     |     |        |       |                                                     |                                       |        |      |             |                |
| 254 | AUG | 16023 | 16206 | 609 | 69.656 | 5.69  | large terminase<br>protein                          | [ <i>Klebsiella</i> phage KP15]       | 0.0    | 100% | 100% (100%) | YP_003580049.1 |
| +   |     | 2     | 1     |     |        |       |                                                     |                                       |        |      |             |                |
| 255 | AUG | 16208 | 16407 | 663 | 71.994 | 4.80  | phage tail sheath<br>monomer                        | [ <i>Klebsiella</i> phage PMBT1]      | 0.0    | 100% | 100% (100%) | SCO64787.1     |
| +   |     | 1     | 2     |     |        |       |                                                     |                                       |        |      |             |                |
| 256 | AUG | 16412 | 16460 | 161 | 18.223 | 4.68  | tail tube protein                                   | [ <i>Klebsiella</i> phage KP15]       | 8e-117 | 100% | 100% (100%) | YP_003580053.1 |
| +   |     | 1     | 6     |     |        |       |                                                     |                                       |        |      |             |                |
| 257 | AUG | 16466 | 16623 | 524 | 60.723 | 5.15  | portal vertex<br>protein                            | [ <i>Klebsiella</i> phage KP15]       | 0.0    | 100% | 100% (100%) | YP_003580054.1 |
| +   |     | 2     | 6     |     |        |       |                                                     |                                       |        |      |             |                |
| 258 | AUG | 16623 | 16647 | 80  | 9.215  | 4.31  | prohead core<br>protein                             | [ <i>Klebsiella</i> phage Matisse]    | 9e-46  | 100% | 99%(100%)   | YP_009194461.1 |
| +   |     | 6     | 8     |     |        |       |                                                     |                                       |        |      |             |                |
| 259 | AUG | 16648 | 16689 | 134 | 15.120 | 10.19 | prohead core<br>protein                             | [ <i>Klebsiella</i> phage KP15]       | 6e-89  | 100% | 100% (100%) | YP_003580056.1 |
| +   |     | 7     | 1     |     |        |       |                                                     |                                       |        |      |             |                |
| 260 | AUG | 16689 | 16754 | 215 | 23.505 | 5.03  | prohead core and<br>protease                        | [ <i>Klebsiella</i> phage KP27]       | 1e-151 | 100% | 99%(100%)   | YP_007348851.1 |
| +   |     | 4     | 1     |     |        |       |                                                     |                                       |        |      |             |                |
| 261 | AUG | 16757 | 16836 | 262 | 29.278 | 4.33  | prohead core<br>protein                             | [ <i>Klebsiella</i> phage KP15]       | 0.0    | 100% | 100% (100%) | YP_003580058.1 |
| +   |     | 4     | 2     |     |        |       |                                                     |                                       |        |      |             |                |
| 262 | AUG | 16838 | 16995 | 522 | 56.121 | 5.05  | major capsid<br>protein                             | [ <i>Klebsiella</i> phage KP15]       | 0.0    | 100% | 100% (100%) | YP_003580059.1 |
| +   |     | 2     | 0     |     |        |       |                                                     |                                       |        |      |             |                |
| 263 | AUG | 17004 | 17068 | 212 | 24.131 | 9.78  | homing<br>endonuclease                              | [ <i>Klebsiella</i> phage Matisse]    | 3e-152 | 100% | 98% (100%)  | YP_009194466.1 |
| +   |     | 2     | 0     |     |        |       |                                                     |                                       |        |      |             |                |
| 264 | AUG | 17071 | 17200 | 429 | 47.181 | 4.96  | capsid vertex<br>protein                            | [ <i>Klebsiella</i> phage KP15]       | 0.0    | 100% | 99% (100%)  | YP_003580062.1 |
| +   |     | 3     | 2     |     |        |       |                                                     |                                       |        |      |             |                |

+, right orientation; -, left orientation.
